# Supplementary material
Source: PubMed Central journal article supplement (PMC8713441)
Supplement: NIHMS1761188-supplement-Fig_S1-S10.pdf [file NIHMS1761188-supplement-Fig_S1-S10.pdf]

## Supplementary Figures

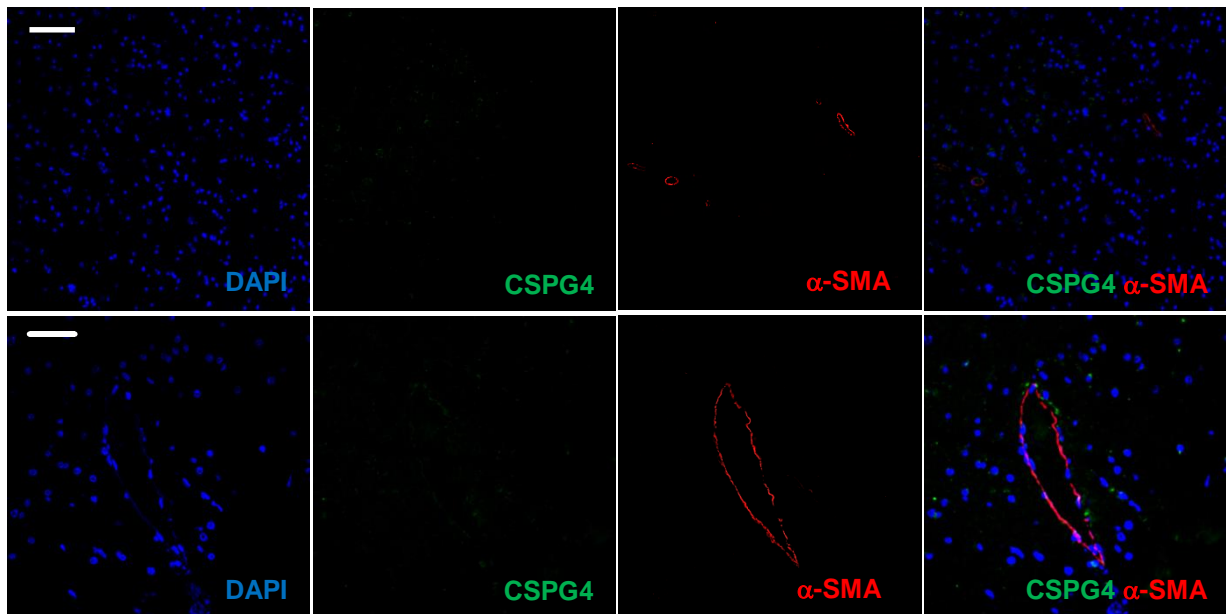

**Fig. S1. Normal brain vessels do not express CSPG4.**

Normal brain samples obtained from diagnostic biopsies of epileptic patients were stained with anti- $\alpha$ -SMA and anti-CSPG4 mAbs. Nuclei are visualized by DAPI staining. Two different areas from a representative normal brain sample show the presence of small and well-organized vessels expressing  $\alpha$ -SMA, but not CSPG4 (scale bar 50  $\mu$ m).

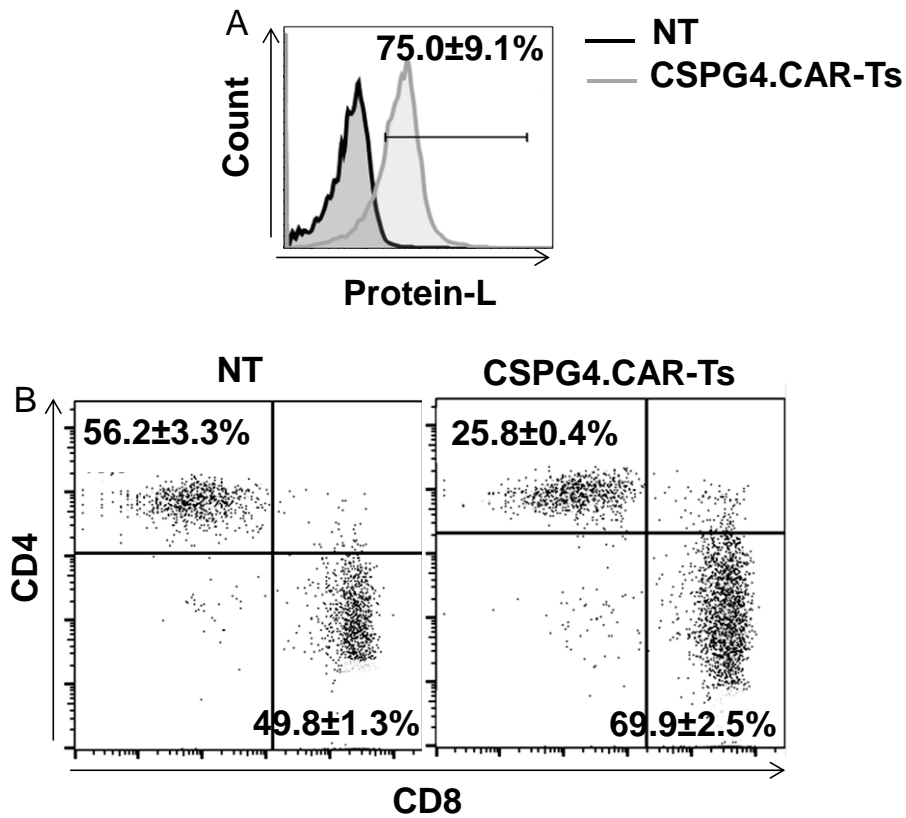

**Fig. S2. CSPG4.CAR is expressed in T cells.**

(A) CAR expression in T cells transduced with the vector encoding the CSPG4.CAR containing the 4-1BB co-stimulatory endodomain (CSPG4.CAR-Ts) was assessed by flow cytometry using protein L staining. (B) Frequency of transduced CD8<sup>+</sup> and CD4<sup>+</sup> T cells was measured on gated CD3<sup>+</sup> T cells (CSPG4.CAR-Ts, left panel), and compared to the frequency of CD8<sup>+</sup> and CD4<sup>+</sup> T cells in non-transduced T cells (NT, right panel). The percentages reported as mean ± SD in the flow cytometry dot plots are representative of three different donors.

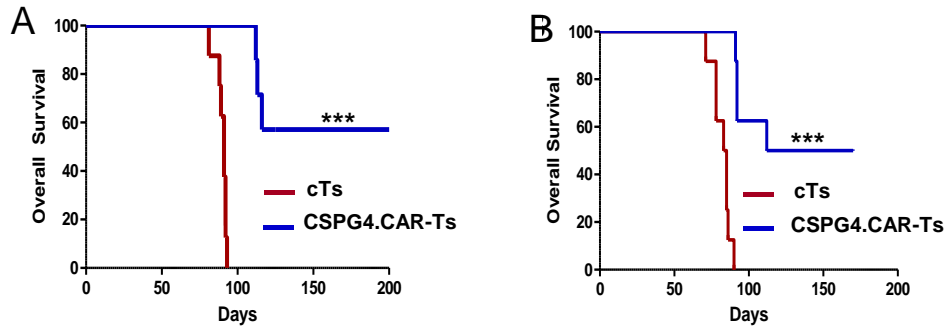

**Fig. S3. CSPG4.CAR-Ts prolonged the survival of mice injected with BT275-NS and BT462-NS.**

Kaplan-Meier survival curves of nude mice implanted intracranially with the GBM-NS CSPG4<sup>H</sup> (97%, BT275-NS) (**A**) and GBM-NS CSPG4<sup>ML</sup> (42.5%, BT462-NS) (**B**) and injected intratumorally with either CSPG4.CAR-Ts or cTs (\*\*\*)  $P < 0.0001$ ).

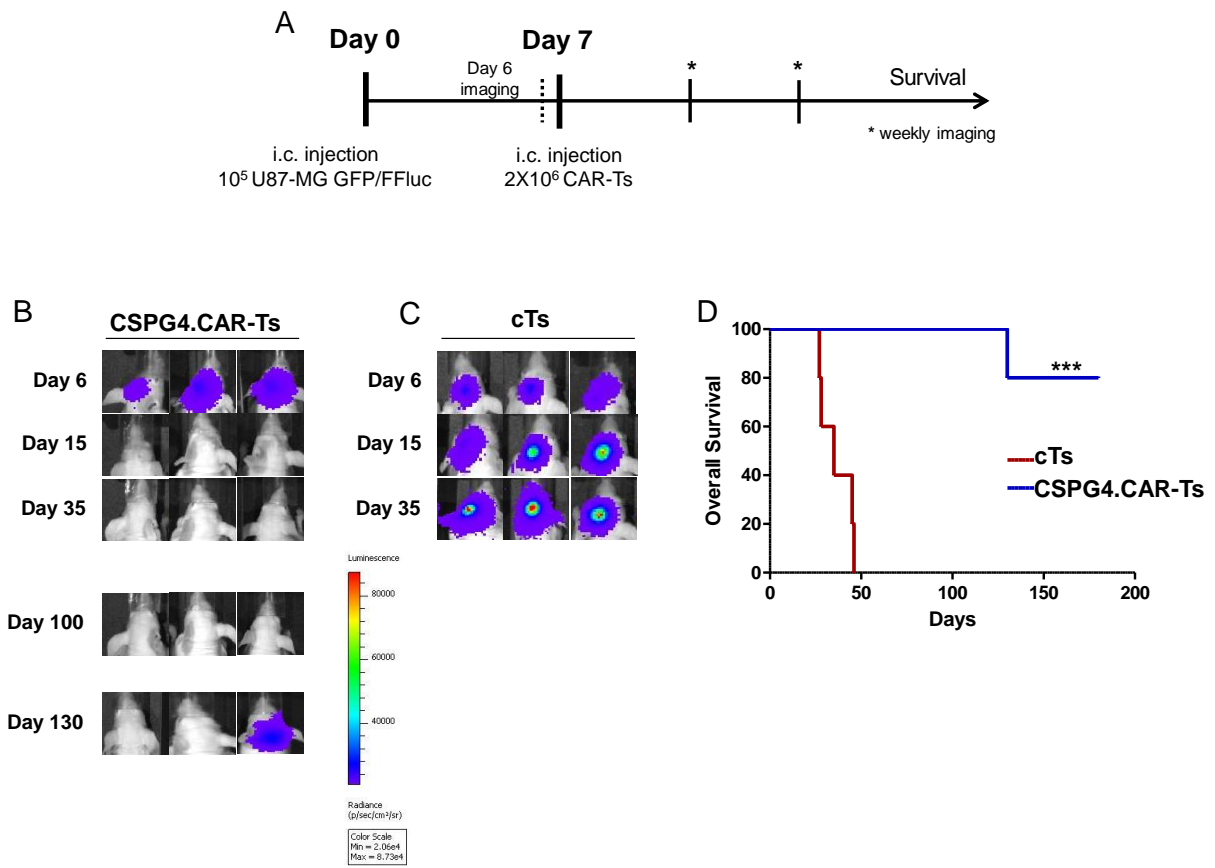

**Fig. S4. CSPG4.CAR-Ts controlled tumor growth in the U87-MG xenograft model.**

(A) Experimental schema of nude mice bearing the human GBM tumor cell line U87-MG labeled with GFP/FFluc and injected intracranially, then infused intratumorally with either CSPG4.CAR-Ts or cTs. (B, C) Representative in vivo imaging of mice treated with either CSPG4.CAR-Ts (B) or cTs (C). (D) Kaplan-Meier survival curves of treated mice (\*\*\*)  $P = 0.002$ .

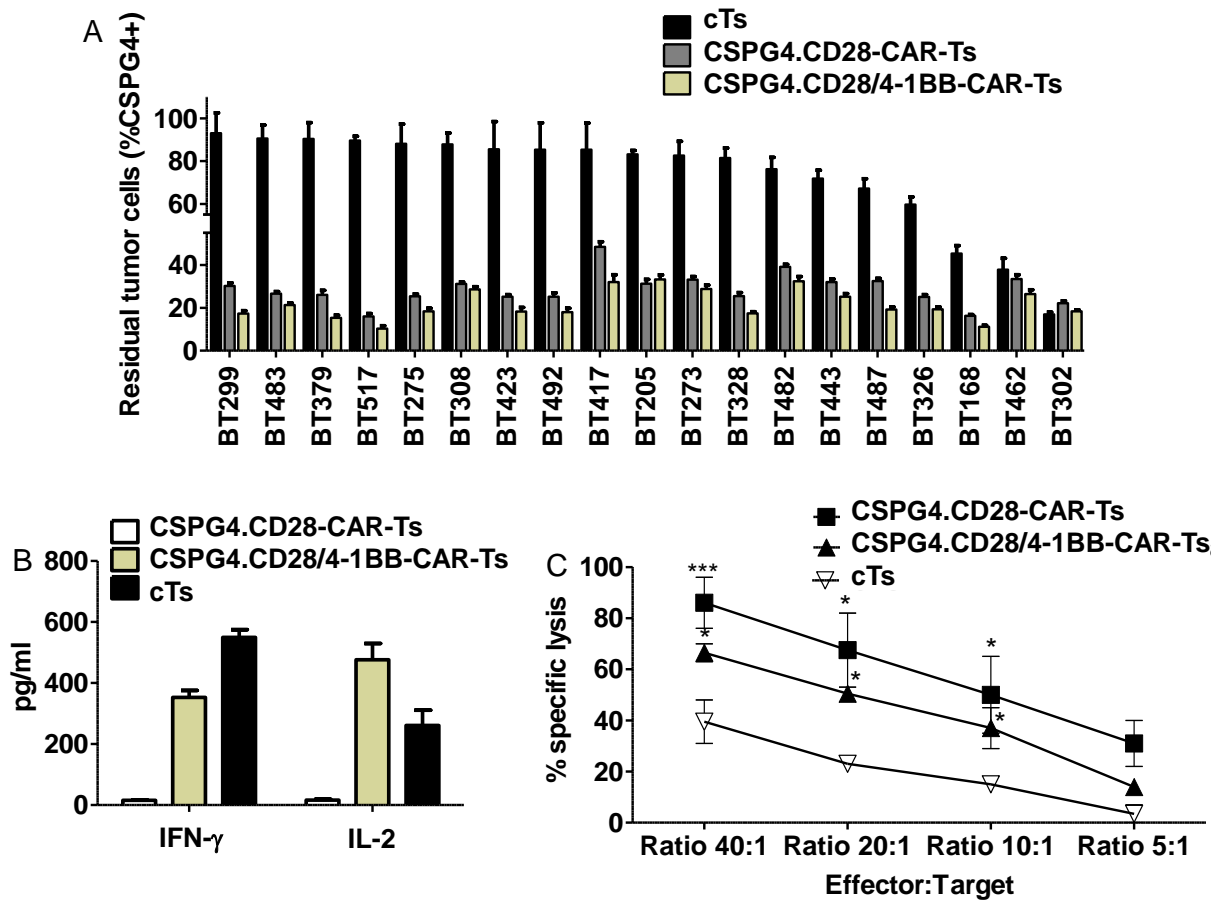

**Fig. S5. CSPG4.CAR encoding either CD28 or CD28/4-1BB showed lower antitumor activity as compared to CSPG4.CAR encoding 4-1BB.**

(A) GBM-NS were co-cultured in vitro with either cTs or T cells expressing the CSPG4.CAR containing either CD28 or CD28/4-1BB co-stimulatory endodomains in GBM-NS serum-free medium (DMEM/F12 and B27 supplement). The E:T ratio used was 1:5. GBM-NS and T cells were assessed by flow cytometry on day 3 of co-culture, using CSPG4 and CD3 as markers for GBM-NS and T cells, respectively. Bar graph shows the residual GBM-NS. Data represent mean  $\pm$  SD of six T cell products. (B) IFN- $\gamma$  and IL-2 released by T cells in the supernatants of co-cultures with GBM-NS collected after 24 hours. Cytokines were measured by specific ELISA. (C) Cytotoxic activity of cTs and T cells expressing the CSPG4.CAR containing either CD28 or CD28/4-1BB co-stimulatory endodomains and evaluated in a 6-hour  $^{51}\text{Cr}$  release assay. Data show the mean  $\pm$  SD of four GBM-NS and T cells generated from two donors (\*  $P = 0.01$ , \*\*\*  $P < 0.005$ ).

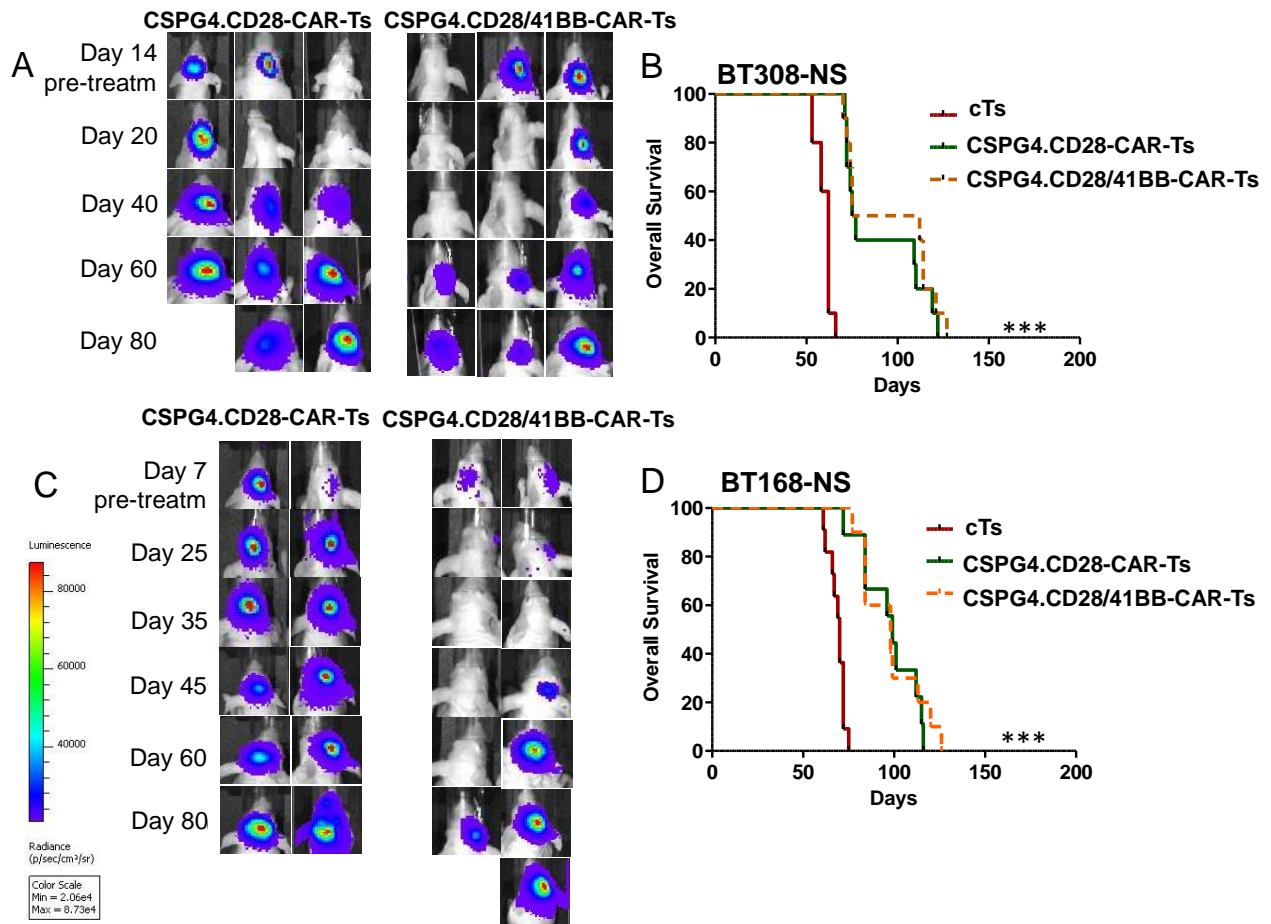

**Fig. S6. CSPG4.CAR encoding either CD28 or CD28/4-1BB co-stimulatory endodomains showed limited antitumor activity in vivo.**

(A-D) Nude mice bearing intracranial GBM-NS CSPG4<sup>H</sup> (BT308-NS) (A, B) or GBM-NS CSPG4<sup>ML</sup> (BT168-NS) (C, D) were injected intratumorally with either cTs or T cells expressing the CSPG4.CAR encoding either CD28 or CD28/4-1BB co-stimulatory endodomains. (A, C) Representative in vivo imaging of treated mice. (B, D) Kaplan-Meier survival curves of treated mice (\*\*  $P < 0.001$ ).

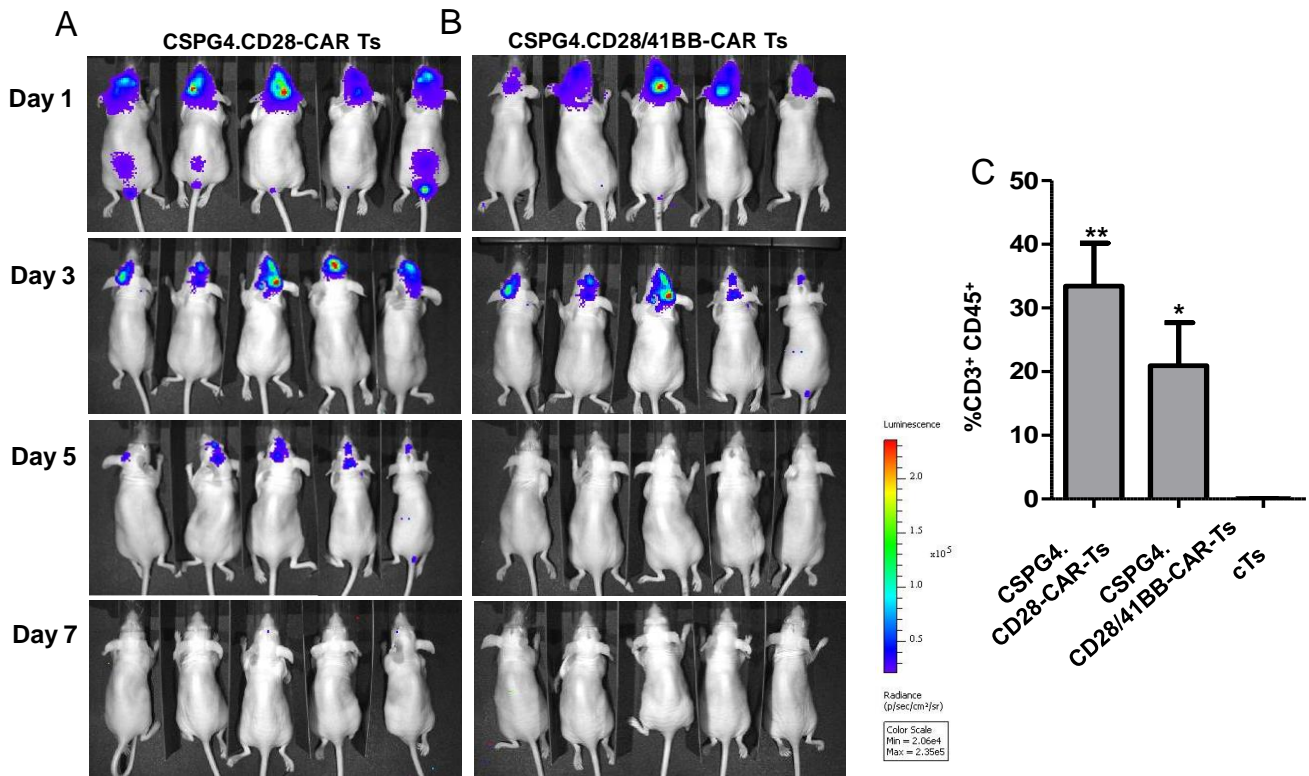

**Fig. S7. CSPG4.CAR-Ts encoding either CD28 or CD28 and 4-1BB persisted for less than five days.**

(A, B) CSPG4.CAR-Ts encoding either CD28 (A) or CD28/4-1BB (B) persisted for 5 and 3 days, respectively, upon intratumoral inoculation in tumor-bearing mice. (C) CSPG4.CAR-Ts were detected within the tumor 1 week after infusion, as measured by flow cytometry, whereas T cells were undetectable in mice infused with cTs (\*  $P < 0.01$ , \*\*  $P = 0.005$ ).



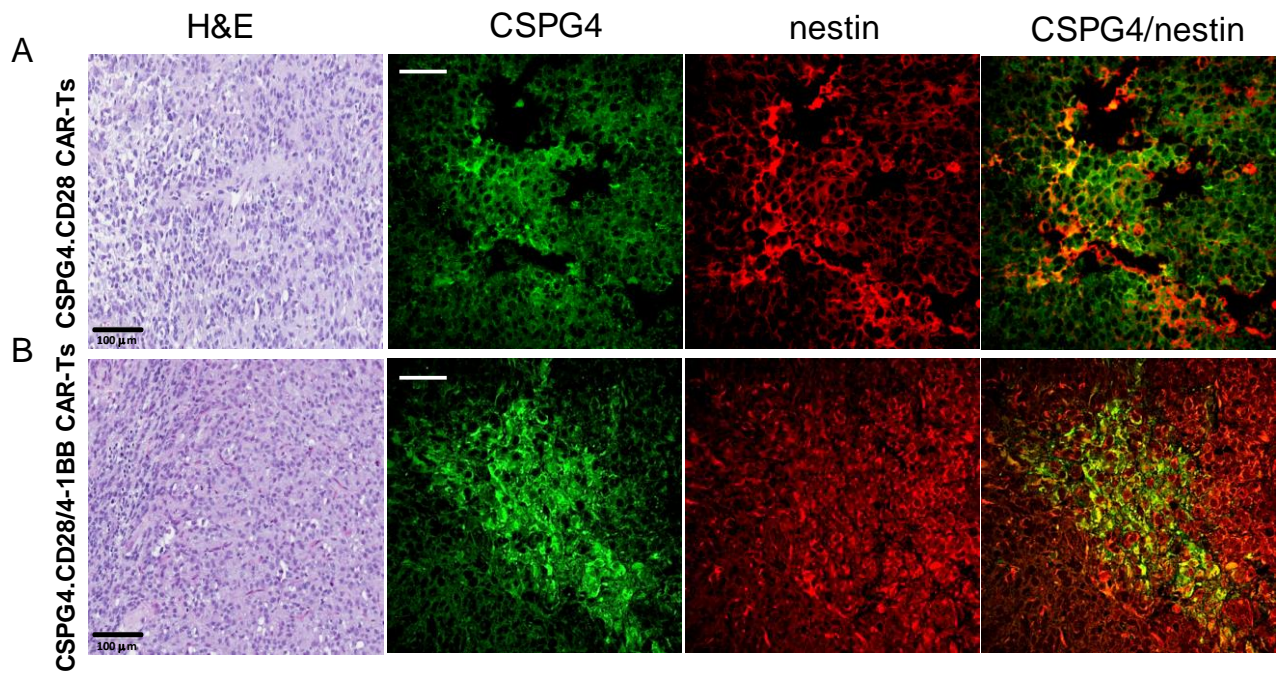

**Fig. S8. GBM-NS-derived gliomas recurring in vivo retained CSPG4 expression.**

GBM-NS-derived gliomas were removed from mice previously treated with T cells expressing the CSPG4.CAR containing CD28 (A) or CD28/4-1BB (B) co-stimulatory endodomains. Hematoxylin and eosin (H&E) showed that gliomas are partially proliferating based on the low density of tumor cells (scale bar 100 μm). Tumor masses co-expressed high amounts of CSPG4 and nestin, recapitulating the phenotype of the originating implanted GBM-NS (scale bar 50 μm).



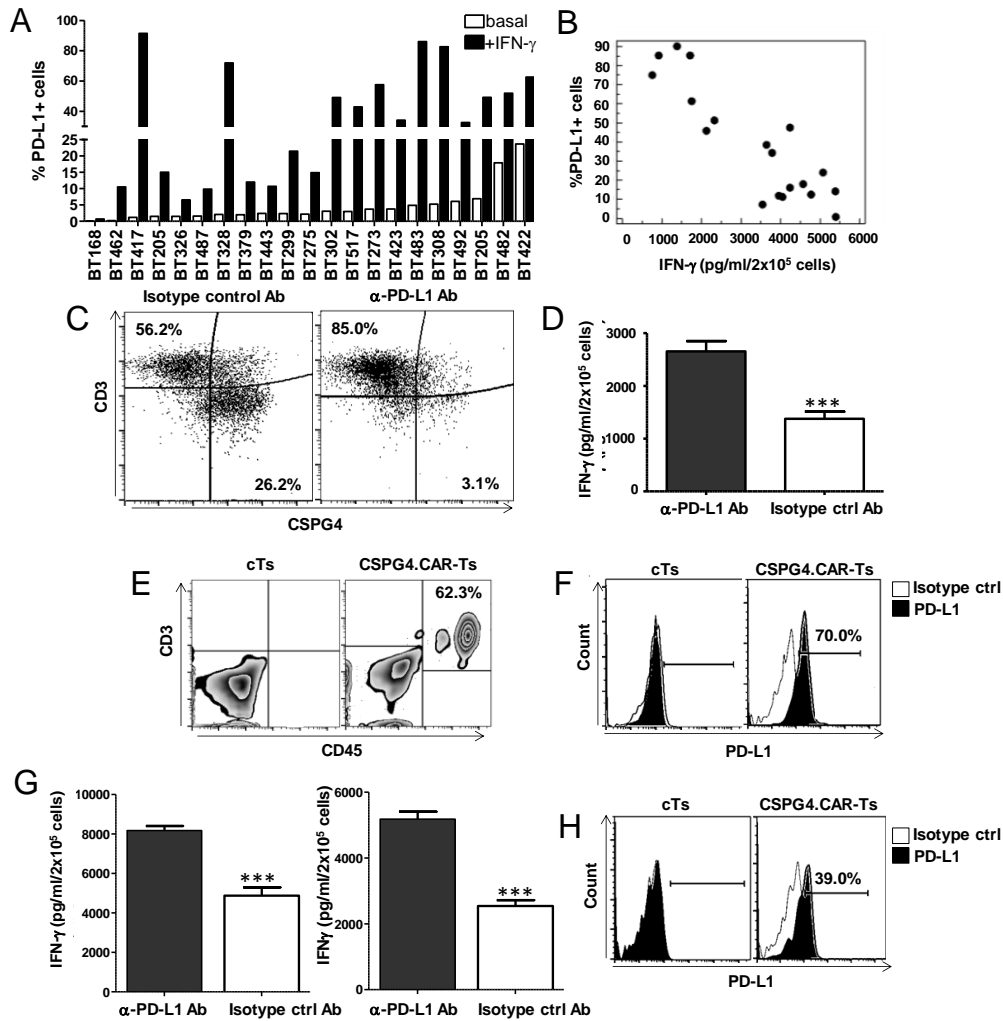

**Fig. S9. GBM-NS upregulated PD-L1 in response to IFN- $\gamma$ .**

(A) GBM-NS express low amounts of PD-L1, but they differentially upregulate PD-L1 when stimulated in vitro with recombinant IFN- $\gamma$  (500 pg/mL) for 24 hours. GBM-NS are ordered from the lowest to the highest basal PD-L1 expression. BT417-NS, showed the highest expression of PD-L1 upon IFN- $\gamma$  stimulation. (B) We correlated the expression of PD-L1 by GBM-NS after IFN- $\gamma$  stimulation with the amount of IFN- $\gamma$  secreted by CSPG4.CAR-Ts co-cultured with GBM-NS, and found a significant inverse correlation ( $n=19$ ,  $P < 0.0001$ ). (C, D) Co-culture of CSPG4.CAR-Ts with BT417-NS in the presence of  $\alpha$ -PD-L1 Ab improved both the killing of BT417-NS (C) and IFN- $\gamma$  production (D) compared to the isotype control at an E:T ratio 1:5. (E, F) BT417-NS were implanted intracranially in nude mice. The tumor mass removed one week after the infusion of either cTs or CSPG4.CAR-Ts showed the presence of infiltrating T cells (E) and upregulation of PD-L1 (from 0% to 70%) (F) only in mice inoculated with CSPG4.CAR-Ts. Dot plots showing the presence of CSPG4.CAR-Ts within the tumor one week after T cell inoculation are in (E). Flow cytometry histograms showing the expression of PD-L1 in tumors from mice treated with CSPG4.CAR-Ts compared to mice treated with cTs are shown in (F). (G) Blocking PD-L1 during the co-culture of CSPG4.CAR-Ts with two other GBM-NS (BT275-NS and BT308-NS) in the

presence of  $\alpha$ -PD-L1 Ab improved IFN- $\gamma$  production compared to the isotype control at an E:T ratio 1:5. **(H)** Tumor mass derived from BT308-NS implantation and explanted one week after CSPG4.CAR-T infusion upregulated PD-L1 compared to cTs (from 0% to 39%).

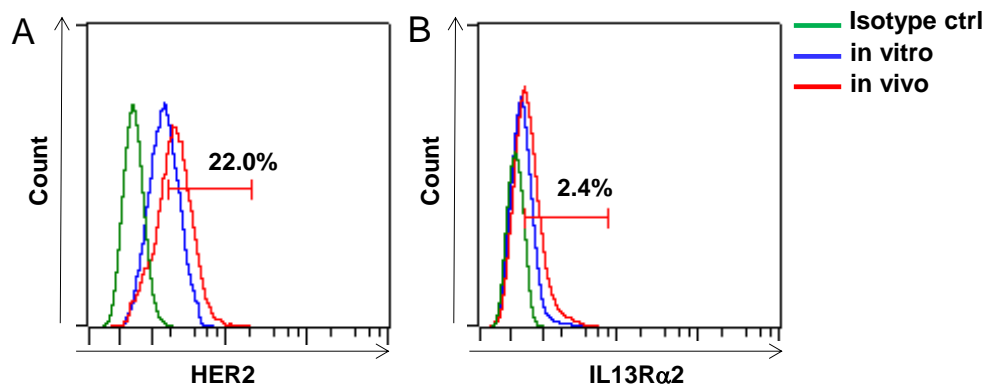

**Fig. S10. HER-2 and IL13R $\alpha$ 2 expression is not upregulated in GBM-NS in xenograft models.** Tumors from BT168-NS xenografts were explanted 1 week after intracranial inoculation in mice. Engrafted GBM-NS showed similar expression of HER2 (**A**) and IL13R $\alpha$ 2 (**B**) as compared to cells growing in vitro (HER2: 23.4 vs 22.0%; IL13R $\alpha$ 2: 2.7 vs 2.4%). Blue and red lines indicate antigen expression in GBM-NS growing in vitro and in vivo, respectively. Green lines indicate the isotype controls.

**Table S1. GBM characterization based on CSPG4 expression and molecular subtypes**

| Subtype     | High expression of CSPG4 |           | Moderate/low expression of CSPG4 |           |
|-------------|--------------------------|-----------|----------------------------------|-----------|
|             | N. of GBM (tot. 28)      | % subtype | N. of GBM (tot. 14)              | % subtype |
| <b>MES</b>  | 10                       | 35.7      | 3                                | 21.4      |
| <b>CLAS</b> | 11                       | 39.3      | 6                                | 42.9      |
| <b>PN</b>   | 7                        | 25.0      | 5                                | 35.7      |

Abbreviations. MES: mesenchymal; CLAS: classical; PN: proneural
